# Supplementary material for: A Simple Method of Preparation of High Silica Zeolite Y and Its Performance in the Catalytic Cracking of Cumene
Source: Hindawi journal article supplement (doi:10.1155/2016/1486107), 2016-01-01
Supplement: f1 [file 1486107.f1.docx]

Fig. S1 XRD patterns for NaY zeolite samples with different H2SO4/Al2O3

H2SO4/Al2O3 = 0 (A) ; 0.67(B) ; 1.34(C) ; 2.01(D)

A-1:NaY-0-4; A-2:NaY-0-8; A-3:NaY-0-12; A-4:NaY-0-24; A-5:NaY-0-120

B-1:NaY-0.67-24; B-2:NaY-0.67-48; B-3:NaY-0.67-72; B-4:NaY-0.67-144; B-5:NaY-0.67-240

C-1:NaY-1.34-192; C-2:NaY-1.34-216; C-3:NaY-1.34-240; C-4:NaY-1.34-264; C-5:NaY-1.34-312; C-6:NaY-1.34-528

D-1:NaY-2.01-312; D-2:NaY-2.01-720
